# Supplementary material
Source: PubMed Central journal article supplement (PMC3471746)
Supplement: supp_M112.401000_jbc.M112.401000-1.pdf [file supp_M112.401000_jbc.M112.401000-1.pdf]

## **SUPPLEMENTAL INFORMATION**

Biosynthesis of the Polymannose Lipopolysaccharide O Antigens from *Escherichia coli* Serotypes O8 and O9a Requires a Unique Combination of Mannosyltransferase Modules in Single- and Multi-Active Site Enzymes

**Laura K. Greenfield, Michele R. Richards, Jianjun Li, Warren W. Wakarchuk, Todd L. Lowary, and Chris Whitfield\***

\*To whom correspondence may be addressed: Chris Whitfield, Department of Molecular and Cellular Biology, Science Complex, University of Guelph, Guelph, Ontario N1G 2W1 Canada. Tel.: 519-824-4120, Ext. 53361; FAX: 519-837-3273; E-mail: [cwhitfie@uoguelph.ca](mailto:cwhitfie@uoguelph.ca).

**Table S1: Primer sequences used for the production of recombinant plasmids and chromosomal mutants.**

| <b>Primer</b> | <b>Sequence<sup>a,b</sup> (5'→3')</b>                                          | <b>Features</b>                                                                                                                                                                   |
|---------------|--------------------------------------------------------------------------------|-----------------------------------------------------------------------------------------------------------------------------------------------------------------------------------|
| WaaLK12a      | GCAGTTTTGGAAAAGTTATCATC<br>ATTATAAAGGTAACATgtgtagg<br>ctggagctgcttcg           | Forward primer used for the amplification of <i>waaL</i> <sup>K-12</sup> in the creation of CWG1006                                                                               |
| WaaLK12b      | AGTGAGTTTTAACTCACTTCTTA<br>AACTTGTTTATTCTTAAcatatgaatat<br>cctccttag           | Reverse primer used for the amplification of <i>waaL</i> <sup>K-12</sup> in the creation of CWG1006                                                                               |
| O8WbdBLRFw    | AAGAGGGGTTAGATAATGTGTC<br>ATTTATTATGAAAATTATTTTTG<br>CTACTgtgtaggctggagctgcttc | Forward primer used for the amplification of <i>wbdB</i> <sup>O8</sup> in the creation of CWG1007                                                                                 |
| CB53          | ACTGCGGTGGCCCTTGTGATGAG<br>TTCGTTATGAAAATTATTTTTGC<br>TACTgtgtaggctggagctgcttc | Forward primer used for the amplification of <i>wbdB</i> <sup>O9a</sup> in the creation of CWG1009                                                                                |
| CB54          | TTAGAGTAATTTATAGGCGTTAA<br>TGGTCTGGGTCGTACAGTTCTCC<br>CACGAcatatgaatatcctcctta | Reverse primer used for the amplification of <i>wbdB</i> <sup>O8</sup> and <i>wbdB</i> <sup>O9a</sup> in the creation of CWG1007 and CWG1009                                      |
| CB55          | ACGCTATAAATTACTCTAAGGG<br>TGTCAGTTGAGAGTTCTACACGT<br>CTATgtgtaggctggagctgcttc  | Forward primer used for the amplification of <i>wbdC</i> <sup>O8</sup> and <i>wbdC</i> <sup>O9a</sup> in the creation of CWG1008 and CWG1010                                      |
| LG75          | GGTTTATGAAATTTATCTCAAAC<br>TAACGAAAAATAAATAAGGAGA<br>TTAACgtgtaggctggagctgcttc | Forward primer used for the amplification of <i>wbdA</i> <sup>O9a</sup> in the creation of CWG1105                                                                                |
| LG93          | TCATAACGAACATCACAAGG<br>GCCACCGCAGTAGCCCTGTTGAT<br>AGCGAcatatgaatatcctcctta    | Reverse primer used for the amplification of <i>wbdA</i> <sup>O9a</sup> in the creation of CWG1105                                                                                |
| LG76          | GCGATGAGTATTTATAACGAATT<br>AAAAAATAAAAATACGGAGAAA<br>TAACGgtgtaggctggagctgcttc | Forward primer used for the amplification of <i>wbdA</i> <sup>O8</sup> in the creation of CWG1104                                                                                 |
| LG77          | TTATCTAACCCCTCTTGTATTCA<br>AAGGCAAAAATAACAAGAGAGA<br>TATTTcatatgaatatcctcctta  | Reverse primer used for the amplification of <i>wbdA</i> <sup>O8</sup> in the creation of CWG1104                                                                                 |
| CB56          | TCAGGATTTGCTTTCCAGCAATG<br>TAGTGTAGAGATTGACATAGGC<br>GTCAATcatatgaatatcctcctta | Reverse primer used for the amplification of <i>wbdC</i> <sup>O8</sup> and <i>wbdC</i> <sup>O9a</sup> in the creation of CWG1008 and CWG1010                                      |
| CB57          | tgtgatgaattcaccATGAAAATTATTTT<br>TGCTACTGAGCCAATTAATAAC                        | Forward primer used for the amplification of <i>wbdB</i> <sup>O9a/O8</sup> in the creation of pWQ576, pWQ578, pWQ580 and pWQ582; <i>EcoRI</i> restriction site                    |
| CB59          | ctctaagaattcaccATGAGAGTTCTACA<br>CGTCTATAAGACCTA                               | Forward primer used for the amplification of <i>wbdC</i> <sup>O9a</sup> in the creation of pWQ579; <i>EcoRI</i> restriction site                                                  |
| WbdCR1        | gatcaagcttTCAGGATTTGCTTTCCA<br>GCAATGTAGTG                                     | Reverse primer used for the amplification of <i>wbdC</i> <sup>O9a/O8</sup> in the creation of pWQ575, pWQ577, pWQ579, pWQ580, pWQ581, and pWQ582; <i>HindIII</i> restriction site |
| WbdCMaIE      | TTGAGAGTTCTACACGTCTATAA<br>GACC                                                | Forward primer used for the amplification of <i>wbdC</i> <sup>O9a</sup> in the creation of pWQ575                                                                                 |
| LG8           | gatcaagcttTTAGAGTAATTTATAGG                                                    | Reverse primer used for the amplification                                                                                                                                         |

|          |                                                                                          |                                                                                                                                  |
|----------|------------------------------------------------------------------------------------------|----------------------------------------------------------------------------------------------------------------------------------|
|          | CGTTAATGG                                                                                | of <i>wbdB</i> <sup>O9a/O8</sup> in the creation of pWQ576 and pWQ578; <i>Hind</i> III restriction site                          |
| LG45     | ctctaaga <u>attcacc</u> TTGAGAGTTCTACA<br>CGTCTATAAAGACTTAC                              | Forward primer used for the amplification of <i>wbdC</i> <sup>O8</sup> in the creation of pWQ577; <i>Eco</i> RI restriction site |
| LG68     | ctctaaga <u>attcacc</u> ATGAGAGTTCTACA<br>CGTCTATAAAGACTTACTATCCCG                       | Forward primer used for the amplification of <i>wbdC</i> <sup>O8</sup> in the creation of pWQ581; <i>Eco</i> RI restriction site |
| LG104    | gatcgat <u>ctaga</u> TTATTTAAAATATTTA<br>GCTTTAGCTAAGCC                                  | Reverse primer used for the amplification of <i>wbdA</i> <sup>O8</sup> in the creation of pWQ588; <i>Xba</i> I restriction site  |
| LG108    | gatcg <u>accatggt</u> acatcatcatcatcatcatcatcatcat<br>atcatCGTATTGTCATAGATTTACA<br>AGGCG | Forward primer used for the amplification of <i>wbdA</i> <sup>O8</sup> in the creation of pWQ588; <i>Nco</i> I restriction site  |
| LCWbdAF1 | ccgctc <u>gag</u> ATGCGTATTGTCATAGA<br>TTTAC                                             | Forward primer used for the amplification of <i>wbdA</i> <sup>O8</sup> in the creation of pWQ587; <i>Xho</i> I restriction site  |
| LCWbdAR2 | ccgca <u>gctg</u> AACCCCTCTTGTATTCA<br>AAGGC                                             | Reverse primer used for the amplification of <i>wbdA</i> <sup>O8</sup> in the creation of pWQ587; <i>Pvu</i> II restriction site |

<sup>a</sup>restriction sites are underlined

<sup>b</sup>non-chromosomal sequence is shown in lower-case letters

**Table S2: MS/MS confirmation of the products generated by WbdC<sup>O9a</sup> and WbdCB<sup>O9a</sup> using the synthetic GlcNAc-PP-C<sub>13</sub> acceptor.**

| MS peak (m/z)       | MS/MS peaks (m/z)   | Identity <sup>a</sup>                                                                |
|---------------------|---------------------|--------------------------------------------------------------------------------------|
| 724.8 <sup>b</sup>  | 726.5 <sup>b</sup>  | Man-GlcNAc-PP-C <sub>13</sub>                                                        |
|                     | 366                 | Man-GlcNAc                                                                           |
|                     | 204                 | GlcNAc                                                                               |
|                     | 186                 | Dehydration product of GlcNAc                                                        |
|                     | 168                 | Double dehydration product of GlcNAc                                                 |
|                     | 138                 | Double dehydration product of GlcNAc with further neutral loss of CH <sub>2</sub> OH |
| 1048.8 <sup>b</sup> | 1050.5 <sup>b</sup> | (Man) <sub>3</sub> -GlcNAc-PP-C <sub>13</sub>                                        |
|                     | 690                 | (Man) <sub>3</sub> -GlcNAc                                                           |
|                     | 528                 | (Man) <sub>2</sub> -GlcNAc                                                           |
|                     | 366                 | Man-GlcNAc                                                                           |
|                     | 204                 | GlcNAc                                                                               |
|                     | 186                 | Dehydration product of GlcNAc                                                        |
| 1210.8 <sup>b</sup> | 1212.5 <sup>b</sup> | (Man) <sub>4</sub> -GlcNAc-PP-C <sub>13</sub>                                        |
|                     | 852                 | (Man) <sub>4</sub> -GlcNAc                                                           |
|                     | 690                 | (Man) <sub>3</sub> -GlcNAc                                                           |
|                     | 528                 | (Man) <sub>2</sub> -GlcNAc                                                           |
|                     | 366                 | Man-GlcNAc                                                                           |
|                     | 204                 | GlcNAc                                                                               |
|                     | 186                 | Dehydration product of GlcNAc                                                        |
|                     | 168                 | Double dehydration product of GlcNAc                                                 |

<sup>a</sup>Man not ionized

<sup>b</sup>A m/z difference of 1.7 is observed because CE-MS were acquired in negative-ion mode and MS/MS in positive-ion mode

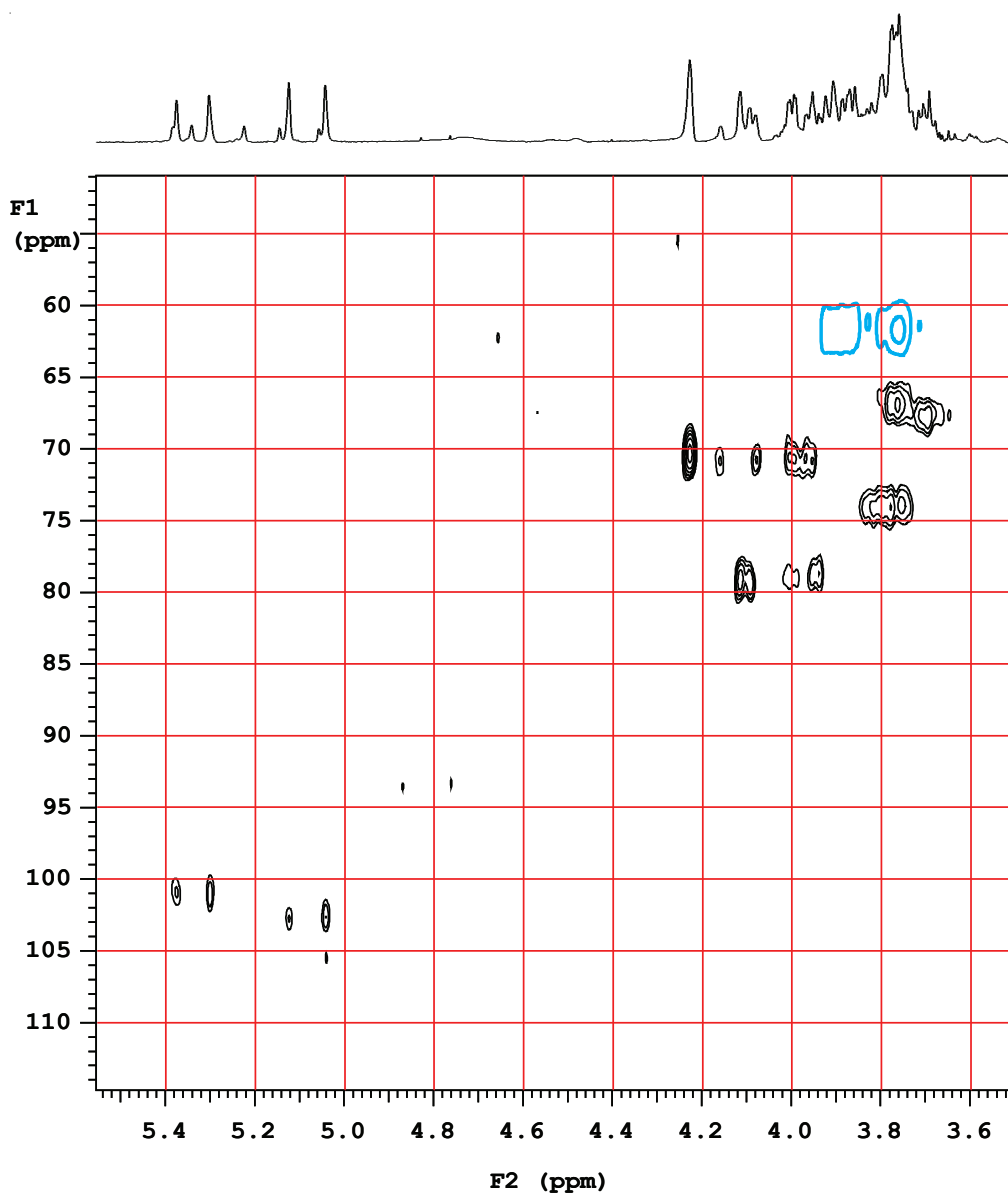

FIGURE S1:  $^1\text{H}$ - $^{13}\text{C}$  gHSQC spectrum for the products synthesized by WbdA<sup>O9a</sup> using Acceptor B.

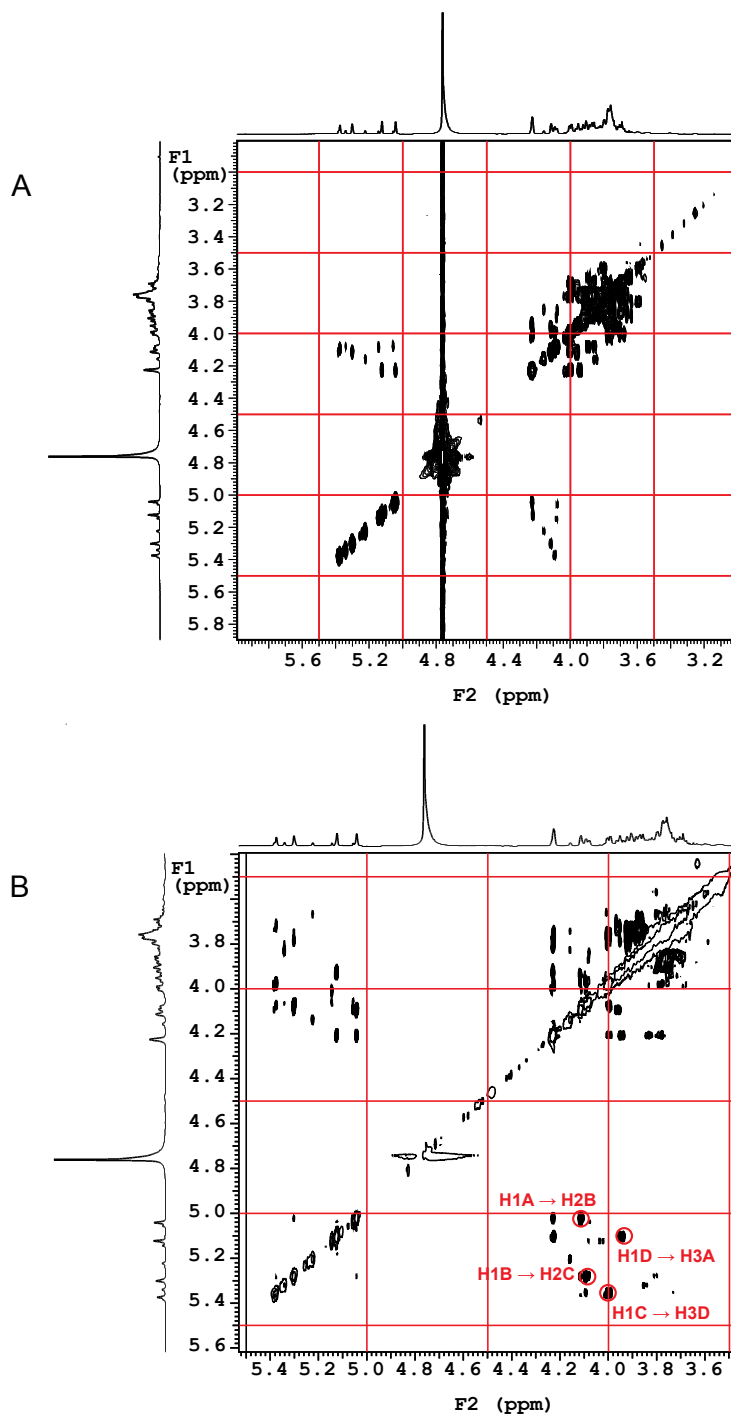

**FIGURE S2: gCOSY and tROESY spectra for the products synthesized by WbdA<sup>O9a</sup> using Acceptor B.** *Panel A* shows the gCOSY spectrum and *panel B*, the tROESY spectrum for the reaction products generated by WbdA<sup>O9a</sup> using Acceptor B.

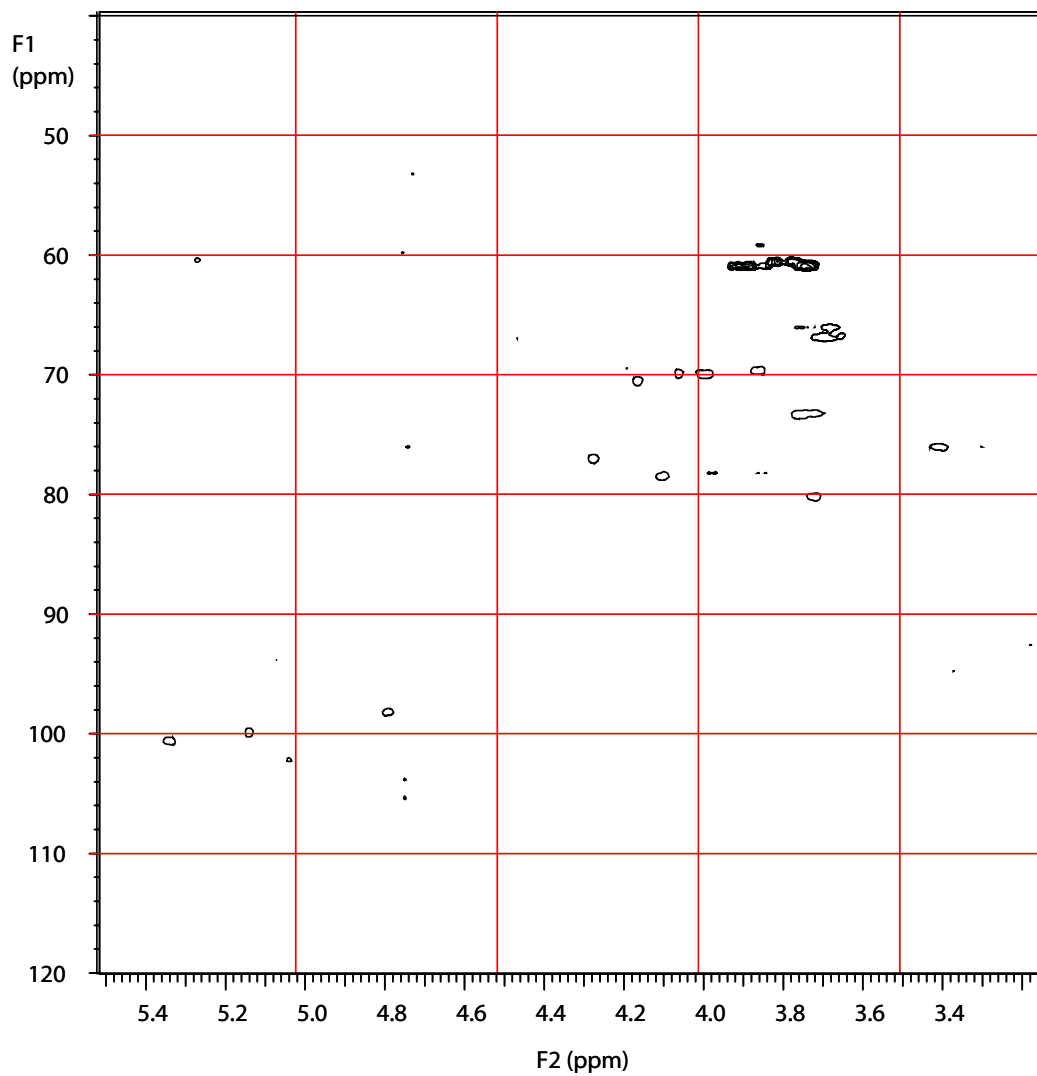

**FIGURE S3:**  $^1\text{H}$ - $^{13}\text{C}$  gHSQC spectrum for the products synthesized by WbdA<sup>O8</sup> using Acceptor A.

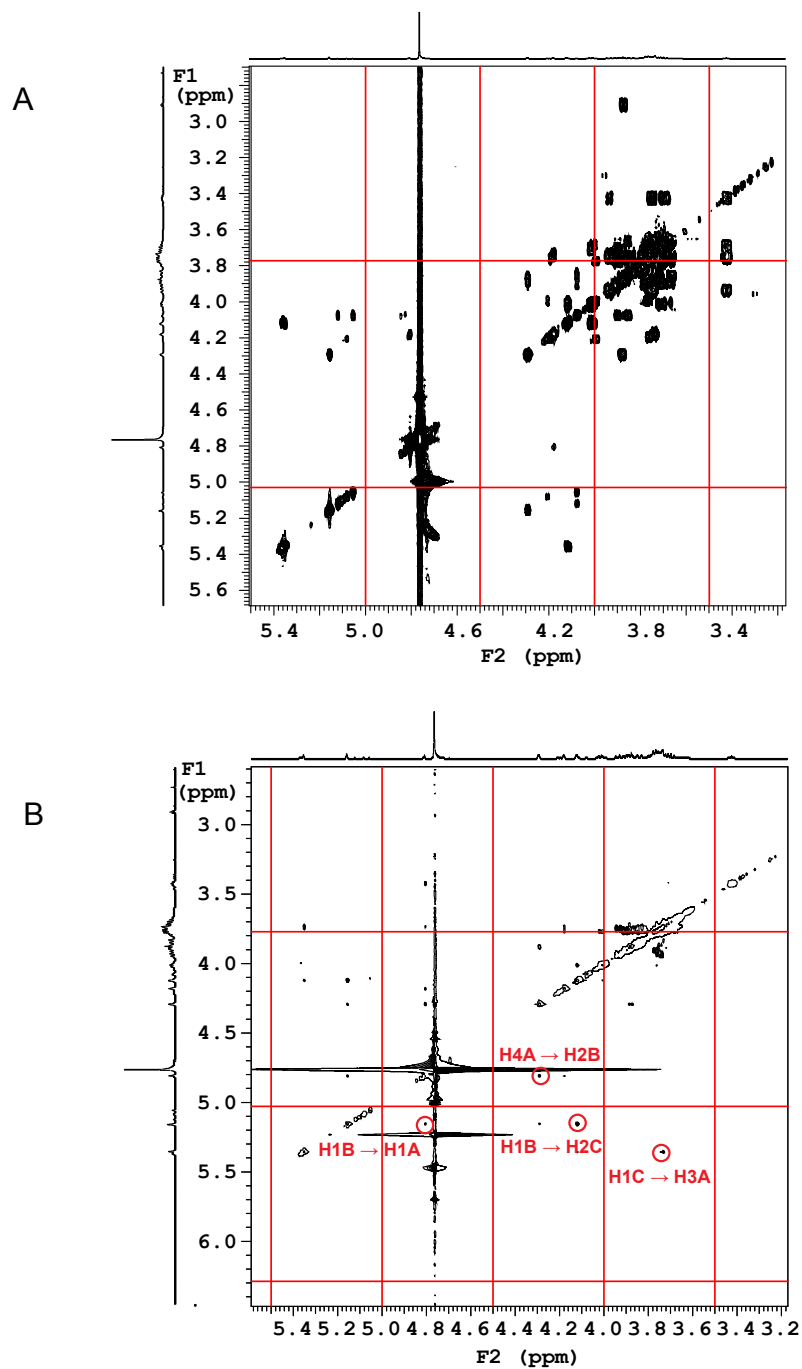

**FIGURE S4: gCOSY and tROESY spectra for the products synthesized by WbdA<sup>08</sup> using Acceptor A.** Panel A shows the gCOSY spectrum and panel B, the tROESY spectrum for the reaction products generated by WbdA<sup>08</sup> using Acceptor A.
